# Supplementary material
Source: PubMed Central journal article supplement (PMC4546866)
Supplement: NIHMS695785-supplement-2.pdf [file NIHMS695785-supplement-2.pdf]

## Provider Baseline Questionnaire

Site ID  
Provider ID

\_\_\_\_\_  
Date form completed

1. Please indicate the percentage of adult patient visits in which you (or your staff) do each of the following related to weight management in your practice?

| <b>For <u>what percent of patient visits</u> do you:</b> | <b>0-9%</b> | <b>10-24%</b> | <b>25-49%</b> | <b>50-74%</b> | <b>75-100%</b> |
|----------------------------------------------------------|-------------|---------------|---------------|---------------|----------------|
| a) Measure height                                        |             |               |               |               |                |
| b) Measure weight                                        |             |               |               |               |                |
| c) Measure waist circumference                           |             |               |               |               |                |
| d) Calculate BMI                                         |             |               |               |               |                |

2. Please indicate the percentage of obese adult patients (i.e. BMI  $\geq$  30 kg/m<sup>2</sup>) in which you do each of the following related to weight management in your daily practice?

| <b>For <u>what percent of obese patients</u> do you:</b>                                      | <b>0-9%</b> | <b>10-24%</b> | <b>25-49%</b> | <b>50-74%</b> | <b>75-100%</b> |
|-----------------------------------------------------------------------------------------------|-------------|---------------|---------------|---------------|----------------|
| a) Discuss weight management                                                                  |             |               |               |               |                |
| b) Assess the patients' motivation to lose weight                                             |             |               |               |               |                |
| c) Discuss specific dietary recommendations related to losing or maintaining weight           |             |               |               |               |                |
| d) Provide behavioral counseling and help set goals                                           |             |               |               |               |                |
| e) Discuss specific physical activity recommendations related to losing or maintaining weight |             |               |               |               |                |
| f) Refer to a dietician, nutritionist or counselor <u>within your practice</u>                |             |               |               |               |                |
| g) Refer to a dietician, nutritionist or counselor <u>outside your practice</u>               |             |               |               |               |                |
| h) Refer to a commercial weight loss program (e.g. Weight Watchers)                           |             |               |               |               |                |
| i) Refer to another type of weight loss program                                               |             |               |               |               |                |
| j) Prescribe a weight loss medication                                                         |             |               |               |               |                |
| k) Refer for bariatric surgery (if eligible, such as BMI $\geq$ 40 kg/m <sup>2</sup> )        |             |               |               |               |                |

**Provider Baseline Questionnaire**

Site ID \_\_\_\_\_

Provider ID \_\_\_\_\_

Date form completed \_\_\_\_\_

Please provide the following **BACKGROUND INFORMATION** about yourself:

3. What is your current age? \_\_\_\_\_
4. What is your gender?      \_\_\_ Male      \_\_\_ Female
5. Are you Hispanic or Latino? \_\_\_ Yes      \_\_\_ No
6. Which of the following groups would you say best represents your race? (Select one or more.)  
\_\_\_ American-Indian or Alaskan Native  
\_\_\_ Asian  
\_\_\_ Black or African-American  
\_\_\_ Native Hawaiian or Other Pacific Islander  
\_\_\_ White  
\_\_\_ Other (**Specify**): \_\_\_\_\_
7. What is your specialty?  
\_\_\_ General Internal Medicine      \_\_\_ Family Practice      \_\_\_ Medicine/Pediatrics      \_\_\_ General Practice  
\_\_\_ Internal Medicine Subspecialty (specify) \_\_\_\_\_
8. What is the highest medical degree you have obtained?  
\_\_\_ MD      \_\_\_ NP      \_\_\_ PA      \_\_\_ BSN      \_\_\_ RN  
\_\_\_ LPN      \_\_\_ MA      \_\_\_ Other (specify): \_\_\_\_\_      \_\_\_ None
9. In what year did you receive this degree? \_\_\_\_\_       Not applicable
10. How many years have you been a part of this practice? \_\_\_\_\_
11. How many years have you been in practice total? \_\_\_\_\_
12. Please indicate the **number of hours per week** you spend in each of the following. (Indicate 0 hours if none in a particular area.)  
a) Clinical Care \_\_\_\_\_      b) Teaching \_\_\_\_\_      c) Research \_\_\_\_\_      d) Administration \_\_\_\_\_
13. Prior to this study (POWER Trial), have you ever participated in research as an investigator?  
\_\_\_ Yes      \_\_\_ No
14. How would you rate your overall knowledge about addressing weight and weight management issues with patients?  
\_\_\_ Minimal      \_\_\_ Beginner      \_\_\_ Intermediate      \_\_\_ Advanced
15. What is your current weight? \_\_\_\_\_ pounds
16. What is your current height? \_\_\_\_\_ feet      \_\_\_\_\_ inches
